# Supplementary material
Source: HighWire-hosted journal article supplement (https://cmajopen.ca/highwire/filestream/89697/field_highwire_adjunct_files/2/open-2022-0130-3-at.pdf)
Supplement: open-2022-0130-3-at.pdf [file open-2022-0130-3-at.pdf]

### Appendix C. Grey literature website sources

Grey literature searches were conducted using relevant sections of the Canadian Agency for Drugs and Technologies in Health (CADTH) Grey Matters checklist and thorough searches of the following websites:

| Organization                                                          | Website Link                                                                                                      |
|-----------------------------------------------------------------------|-------------------------------------------------------------------------------------------------------------------|
| <b>Canada</b>                                                         |                                                                                                                   |
| <b>Regional/Provincial-level Groups</b>                               |                                                                                                                   |
| UBC's Centre for Health Services and Policy Research (CHSPR)          | <a href="https://chspr.ubc.ca/">https://chspr.ubc.ca/</a>                                                         |
| Alberta Public Health Association (APHA)                              | <a href="https://www.apha.ab.ca/">https://www.apha.ab.ca/</a>                                                     |
| Alberta Health Services                                               | <a href="https://www.albertahealthservices.ca/default.aspx">https://www.albertahealthservices.ca/default.aspx</a> |
| Saskatchewan Health Quality Council                                   | <a href="https://www.hqc.sk.ca/">https://www.hqc.sk.ca/</a>                                                       |
| Manitoba Public Health Association                                    | <a href="https://manitobapha.ca/">https://manitobapha.ca/</a>                                                     |
| Winnipeg Regional Health Authority (WRHA)                             | <a href="https://wrha.mb.ca/health-equity/reports/">https://wrha.mb.ca/health-equity/reports/</a>                 |
| Ontario Ministry of Health and LTC                                    | <a href="http://health.gov.on.ca/en/">http://health.gov.on.ca/en/</a>                                             |
| Ontario Public Health Association (OPHA)                              | <a href="https://opha.on.ca/Home.aspx">https://opha.on.ca/Home.aspx</a>                                           |
| Public Health Ontario (PHO)                                           | <a href="https://www.publichealthontario.ca/">https://www.publichealthontario.ca/</a>                             |
| Wellesley Institute                                                   | <a href="https://www.wellesleyinstitute.com/">https://www.wellesleyinstitute.com/</a>                             |
| Institut national de santé publique du Québec                         | <a href="https://www.inspq.qc.ca/">https://www.inspq.qc.ca/</a>                                                   |
| Quebec Population Health Research Network                             | <a href="https://santepop.qc.ca/en">https://santepop.qc.ca/en</a>                                                 |
| Newfoundland & Labrador Centre For Applied Health Research            | <a href="https://www.nlcahr.mun.ca/">https://www.nlcahr.mun.ca/</a>                                               |
| Public Health Association of Nova Scotia (PHANS)                      | <a href="https://www.phans.ca/">https://www.phans.ca/</a>                                                         |
| <b>National-level Groups</b>                                          |                                                                                                                   |
| Association of Local Public Health Agencies (alPHA)                   | <a href="https://www.alphaweb.org/">https://www.alphaweb.org/</a>                                                 |
| Canadian Association for Health Services and Policy Research (CAHSPR) | <a href="https://cahspr.ca/#home">https://cahspr.ca/#home</a>                                                     |
| Canadian Cancer Society                                               | <a href="https://www.cancer.ca/en/?region=on">https://www.cancer.ca/en/?region=on</a>                             |
| Canadian Institute for Health Information (CIHI)                      | <a href="https://www.cihi.ca/en">https://www.cihi.ca/en</a>                                                       |
| Canadian Public Health Association (CPHA)                             | <a href="https://www.cpha.ca/">https://www.cpha.ca/</a>                                                           |
| The Conference Board of Canada                                        | <a href="https://www.conferenceboard.ca/">https://www.conferenceboard.ca/</a>                                     |
| National Collaborating Centre for Environmental Health (NCCEH)        | <a href="https://ncceh.ca/">https://ncceh.ca/</a>                                                                 |
| <b>International Groups</b>                                           |                                                                                                                   |
| <b>International Organizations</b>                                    |                                                                                                                   |
| Campbell Collaboration                                                | <a href="https://campbellcollaboration.org">https://campbellcollaboration.org</a>                                 |
| Cochrane Methods Equity/ Cochrane                                     | <a href="https://methods.cochrane.org/equity/">https://methods.cochrane.org/equity/</a>                           |
| European Centre for Disease Prevention and Control                    | <a href="https://www.ecdc.europa.eu/en">https://www.ecdc.europa.eu/en</a>                                         |
| European Commission Public Health                                     | <a href="https://ec.europa.eu/health/home_en">https://ec.europa.eu/health/home_en</a>                             |
| Guidelines International Network                                      | <a href="https://g-i-n.net/home">https://g-i-n.net/home</a>                                                       |
| Pan American Health Organization (PAHO)                               | <a href="https://www.paho.org/en">https://www.paho.org/en</a>                                                     |
